# Supplementary material
Source: PubMed Central journal article supplement (PMC2878368)
Supplement: NIHMS125418-supplement-1_si_001.pdf [file NIHMS125418-supplement-1_si_001.pdf]

## Supporting Information

# Comparative Activities of Nickel(II) and Zinc(II) Complexes of Asymmetric [NN'O] Ligands as 26S Proteasome Inhibitors

Michael Frezza,<sup>1</sup> Sarmad Sahiel Hindo,<sup>2</sup> Dajena Tomco,<sup>2</sup> Marco Allard,<sup>2</sup> Qiuzhi Cindy Cui,<sup>1</sup> Mary Jane Heeg,<sup>2</sup> Di Chen,<sup>1</sup> Q. Ping Dou,<sup>1,\*</sup> Cláudio N. Verani<sup>2,\*</sup>

**Figure S1.** Human prostate C4-2B cells were treated with metal compounds, and salts for 18 h followed by measuring accumulated ubiquitinated proteins, PARP cleavage and AR disappearance by Western Blot analysis.

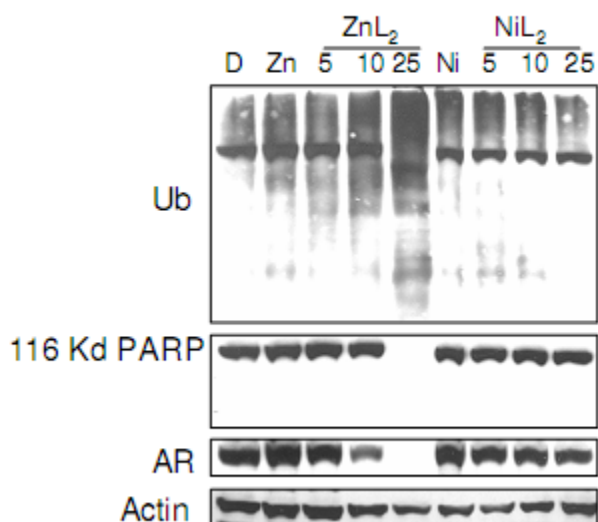

**Figure S2.** Human prostate cancer PC-3 cells were treated with metal compounds and salts for 18 h followed by measuring (A) accumulated ubiquitinated proteins (Ub), and disappearance of PARP by western blot analysis, and (B) apoptotic morphological changes. Magnification x100.

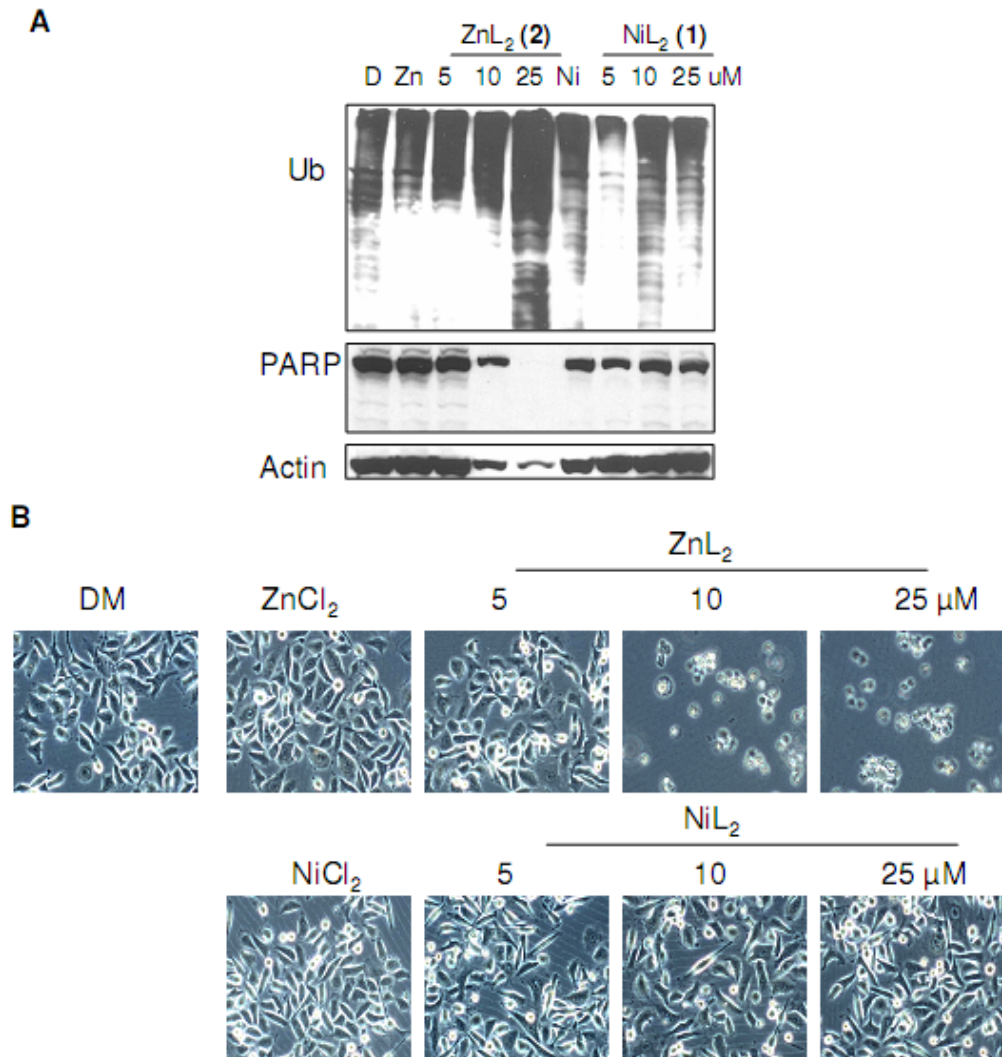

**Figure S3.** Human prostate C4-2B cells were treated with 15  $\mu\text{mol/L}$  of ZnL2 (**2**) for indicated time points, followed by measuring accumulated ubiquitinated proteins, decreased levels of AR, and PARP disappearance by Western Blot analysis. DMSO (DM) was used as solvent control.

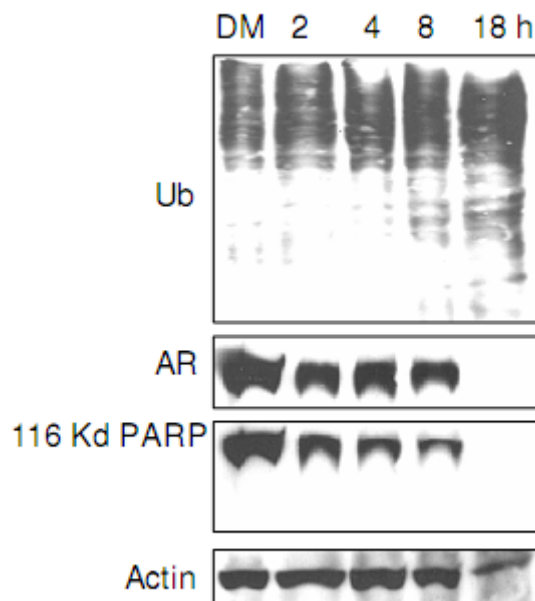

**Figure S4.** Normal breast cells (MCF-10A) were treated with 25  $\mu\text{mol/L}$  of  $\text{ZnCl}_2$ ,  $\text{NiCl}_2$ , and  $\text{NiL}_2$  (**1**), or indicated concentrations of ZnL2 (**2**) for 18h followed by visualization of morphological changes. DMSO (DM) was used as solvent control. Magnification x100.

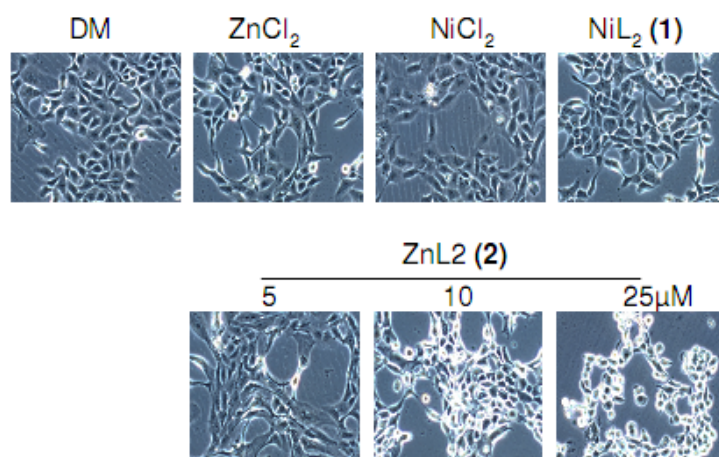

## Optimized Structures Cartesian Coordinates:

(1) E(UB+HF-LYP) = -1589.99416552

|    |             |             |             |
|----|-------------|-------------|-------------|
| H  | -2.39542500 | -2.66437200 | -1.80105500 |
| H  | 2.49736100  | -0.64903300 | -4.65623000 |
| H  | -4.59847600 | -2.35874600 | -1.19377500 |
| I  | 3.61044000  | -3.41220600 | -0.25917700 |
| H  | -0.03480700 | -2.28022600 | -1.08198800 |
| H  | -1.79582200 | -3.44637900 | 0.48846800  |
| H  | -1.57688800 | -1.21074000 | -2.42211300 |
| H  | 1.11770000  | -1.39390100 | -2.71683700 |
| C  | -1.99075400 | -1.67941000 | -1.51852100 |
| C  | 2.23569800  | 0.05377200  | -3.87214200 |
| H  | -0.10988000 | -3.08432700 | 0.94157600  |
| C  | -4.41988300 | -1.32151000 | -0.92146300 |
| N  | -0.82127800 | -1.85279000 | -0.58787000 |
| C  | -1.06952800 | -2.63674800 | 0.65391000  |
| I  | -7.48474000 | -1.31582000 | -0.43965400 |
| C  | 1.45200900  | -0.36413400 | -2.78741800 |
| C  | -3.11212400 | -0.81078000 | -0.97941700 |
| H  | -2.67466000 | -3.27449600 | 2.82436400  |
| H  | 3.30047100  | 1.74787100  | -4.71827200 |
| C  | -5.49221800 | -0.50090500 | -0.53427000 |
| C  | 2.68183800  | 1.38866500  | -3.90061500 |
| H  | 6.09748400  | -1.49131800 | -0.08735800 |
| C  | 3.96615300  | -1.35257700 | 0.25925900  |
| C  | -1.53252900 | -1.75270800 | 1.79629100  |
| N  | 1.09574700  | 0.46633900  | -1.77908000 |
| C  | -2.33012700 | -2.24477700 | 2.84521200  |
| C  | 5.27401900  | -0.84983500 | 0.20631300  |
| O  | 1.60298600  | -1.05637300 | 0.66696700  |
| C  | -2.83660200 | 0.56242200  | -0.63670700 |
| Ni | -0.00009000 | 0.00014500  | 0.00034400  |
| C  | -5.27404500 | 0.84967300  | -0.20675100 |
| C  | 2.83669700  | -0.56243300 | 0.63683300  |
| O  | -1.60292900 | 1.05653600  | -0.66664800 |
| C  | 2.33012200  | 2.24514900  | -2.84444200 |
| C  | 1.53262000  | 1.75298500  | -1.79548400 |
| N  | -1.09571700 | -0.46603100 | 1.77978700  |
| C  | -3.96622100 | 1.35253800  | -0.25956200 |
| H  | -6.09763300 | 1.49113700  | 0.08661700  |
| C  | -2.68205300 | -1.38816600 | 3.90121600  |
| H  | -3.30079200 | -1.74729700 | 4.71882600  |
| C  | 5.49240300  | 0.50064100  | 0.53411300  |
| H  | 2.67473800  | 3.27483900  | -2.82348600 |
| I  | 7.48499900  | 1.31535500  | 0.43931800  |
| C  | 3.11243000  | 0.81067300  | 0.97975000  |
| C  | -1.45218000 | 0.36456000  | 2.78795500  |
| C  | 1.06977500  | 2.63695200  | -0.65298500 |
| C  | 4.42022700  | 1.32128300  | 0.92167700  |
| C  | -2.23600600 | -0.05324800 | 3.87262200  |
| N  | 0.82154500  | 1.85287700  | 0.58874500  |
| H  | 0.11015200  | 3.08465400  | -0.94055100 |
| C  | 1.99120500  | 1.67926800  | 1.51917400  |

|   |             |            |             |
|---|-------------|------------|-------------|
| H | -1.11790600 | 1.39432900 | 2.71728600  |
| I | -3.61083600 | 3.41233100 | 0.25844000  |
| H | 1.79615400  | 3.44649300 | -0.48750000 |
| H | 1.57746400  | 1.21047200 | 2.42275600  |
| H | 0.03536000  | 2.28057300 | 1.08310300  |
| H | 4.59898400  | 2.35843900 | 1.19418600  |
| H | -2.49784600 | 0.64965000 | 4.65656700  |
| H | 2.39595100  | 2.66417500 | 1.80178400  |

(1') E(UB+HF-LYP) = -1589.98833145

|    |             |             |             |
|----|-------------|-------------|-------------|
| H  | -2.76240700 | 2.04086400  | 4.90803600  |
| H  | -1.73300300 | 3.54168300  | 3.17428400  |
| H  | 1.62613700  | 1.71919700  | 2.14107400  |
| H  | 2.32017100  | 3.07711100  | 1.23065000  |
| C  | -2.24644300 | 1.61964100  | 4.04971100  |
| C  | -1.67488500 | 2.46152900  | 3.07986100  |
| H  | 4.48839300  | 2.76279700  | 0.42644300  |
| H  | -0.08155100 | 3.70396900  | 1.28223800  |
| C  | 1.96757100  | 2.03677000  | 1.14777900  |
| H  | -2.54606000 | -0.46108700 | 4.62793100  |
| C  | -2.13110600 | 0.22546000  | 3.89744000  |
| C  | 4.36777300  | 1.68268200  | 0.45129500  |
| C  | 3.10315600  | 1.13693900  | 0.72347700  |
| C  | -1.02167600 | 1.89148700  | 1.97402600  |
| C  | 5.47473500  | 0.84289300  | 0.24713500  |
| C  | -0.39498700 | 2.72950600  | 0.87534900  |
| C  | 2.88828800  | -0.28876400 | 0.76985000  |
| C  | -1.46055000 | -0.26981700 | 2.76908900  |
| C  | 5.33454000  | -0.55115300 | 0.36086600  |
| N  | -0.93189300 | 0.54104900  | 1.82332000  |
| O  | 1.66974100  | -0.79225100 | 0.95920100  |
| N  | 0.74868800  | 1.98801300  | 0.26563500  |
| H  | 6.19245400  | -1.20497700 | 0.24903800  |
| C  | 4.06557500  | -1.08995200 | 0.62806800  |
| H  | -1.14046500 | 2.89386800  | 0.09158300  |
| H  | -1.33567400 | -1.33715600 | 2.62219900  |
| H  | 0.96065700  | 2.37951200  | -0.65479800 |
| Ni | 0.00000000  | 0.00003100  | 0.00004800  |
| H  | -6.19249300 | 1.20492400  | -0.24911000 |
| H  | -0.96073200 | -2.37943600 | 0.65486400  |
| H  | 1.33564400  | 1.33718200  | -2.62214800 |
| H  | 1.14048500  | -2.89375700 | -0.09137800 |
| C  | -4.06559500 | 1.08996000  | -0.62805000 |
| C  | -5.33456100 | 0.55112300  | -0.36092600 |
| N  | -0.74868300 | -1.98795000 | -0.26555500 |
| O  | -1.66973800 | 0.79231800  | -0.95911000 |
| N  | 0.93191100  | -0.54100800 | -1.82321200 |
| C  | 1.46055600  | 0.26984300  | -2.76900000 |
| C  | -2.88828400 | 0.28880200  | -0.76981700 |
| C  | -5.47473200 | -0.84293000 | -0.24725900 |
| C  | 0.39503500  | -2.72944600 | -0.87518300 |
| C  | 1.02174100  | -1.89144900 | -1.97386900 |
| C  | -3.10312800 | -1.13690800 | -0.72351300 |
| C  | -4.36774400 | -1.68268700 | -0.45140700 |
| H  | 2.54608800  | 0.46108200  | -4.62783200 |

|   |             |             |             |
|---|-------------|-------------|-------------|
| C | 2.13114600  | -0.22545200 | -3.89732300 |
| H | -4.48834300 | -2.76280600 | -0.42660400 |
| C | -1.96750100 | -2.03669900 | -1.14778700 |
| H | 0.08164000  | -3.70393200 | -1.28204900 |
| C | 1.67499100  | -2.46150800 | -3.07967100 |
| C | 2.24653600  | -1.61963400 | -4.04954100 |
| H | -2.32007400 | -3.07704500 | -1.23072200 |
| H | -1.62601000 | -1.71907600 | -2.14104600 |
| H | 2.76253200  | -2.04087000 | -4.90784100 |
| H | 1.73314800  | -3.54166400 | -3.17405500 |
| I | 3.91541900  | -3.22271700 | 0.90493000  |
| I | 7.40190000  | 1.69537500  | -0.19913400 |
| I | -3.91548300 | 3.22273800  | -0.90482600 |
| I | -7.40190000 | -1.69547000 | 0.19888400  |

(2) E(UB+HF-LYP) = -1645.712414

|    |             |             |             |
|----|-------------|-------------|-------------|
| H  | 5.74366200  | -0.75991000 | -0.54703100 |
| I  | 4.43235700  | 1.90655200  | -1.54198100 |
| I  | 5.67013200  | -3.68026500 | 0.68110600  |
| I  | -2.58721500 | -2.08549700 | -2.66489600 |
| C  | 4.68653000  | -0.94139600 | -0.38948500 |
| H  | 1.27602100  | 5.25176700  | -2.73967900 |
| C  | 3.74228000  | 0.04125500  | -0.72046700 |
| C  | 4.23713400  | -2.15985900 | 0.15008700  |
| H  | 1.16651500  | 2.83938600  | -1.95823400 |
| C  | 0.72793600  | 4.98716600  | -1.84154500 |
| C  | 2.33580700  | -0.13470900 | -0.53777900 |
| C  | 0.66669700  | 3.64489000  | -1.43186200 |
| O  | 1.45386700  | 0.81129900  | -0.84608100 |
| C  | 2.86473700  | -2.39087900 | 0.33891500  |
| H  | 2.51959500  | -3.34472100 | 0.73021400  |
| C  | 1.92182200  | -1.40298100 | 0.00620600  |
| H  | -0.04455600 | -1.55551700 | -0.85361900 |
| H  | 0.09344100  | 7.00737600  | -1.36409600 |
| O  | -1.74412400 | 0.63281300  | -1.04581700 |
| C  | -3.57612300 | -0.96106000 | -1.12489000 |
| C  | 0.06843600  | 5.96158000  | -1.06951700 |
| H  | -5.26316000 | -2.31178000 | -1.05242000 |
| C  | 0.44196800  | -1.70317000 | 0.11673100  |
| C  | -2.94847100 | 0.23402900  | -0.64469900 |
| C  | -4.82995000 | -1.39632500 | -0.66502300 |
| N  | -0.01437400 | 3.27715400  | -0.31731700 |
| H  | 0.30045300  | -2.75289800 | 0.41751900  |
| Zn | -0.23155700 | 1.22145100  | 0.17723700  |
| C  | -0.63173400 | 5.56736200  | 0.08736000  |
| H  | -2.95777600 | 2.92826800  | -0.25503300 |
| C  | -0.65348400 | 4.20683300  | 0.43865300  |
| N  | -0.30938000 | -0.80390300 | 1.07342200  |
| C  | -3.71573600 | 1.01226800  | 0.29604100  |
| C  | -5.51520100 | -0.62952600 | 0.29483100  |
| H  | 1.98248100  | 3.21377000  | 1.66550600  |
| H  | -1.30545700 | -1.02634500 | 1.00456500  |
| H  | -1.15589600 | 6.29600500  | 0.69913900  |
| C  | -3.19061900 | 2.37848800  | 0.66590600  |
| N  | 1.13208800  | 1.36015200  | 2.07506400  |

|   |             |             |            |
|---|-------------|-------------|------------|
| C | 2.06969800  | 2.32062100  | 2.27579300 |
| C | -4.97003600 | 0.57917700  | 0.75784900 |
| H | 0.53040100  | -1.84641400 | 2.75566800 |
| I | -7.42276300 | -1.30196200 | 1.03632400 |
| N | -1.91629200 | 2.33771000  | 1.45863000 |
| C | 0.14932900  | -0.85109600 | 2.48213300 |
| H | 3.85496500  | 2.96064600  | 3.31088600 |
| C | 1.22517700  | 0.19052800  | 2.75956300 |
| C | 3.12078100  | 2.17055600  | 3.19156600 |
| C | -1.35236500 | 3.69041300  | 1.69130600 |
| H | -3.96015100 | 2.94677800  | 1.21510800 |
| H | -5.52406100 | 1.19748800  | 1.45985000 |
| C | 2.25455500  | -0.03703700 | 3.69357800 |
| C | 3.21139300  | 0.96662800  | 3.91746600 |
| H | -2.12238200 | 4.41705600  | 2.00064600 |
| H | -2.05583700 | 1.83947500  | 2.33958600 |
| H | -0.62096400 | 3.61968600  | 2.50663700 |
| H | 2.31534000  | -0.99048700 | 4.21023300 |
| H | 4.02211600  | 0.80600100  | 4.62268900 |
| H | -0.71674800 | -0.65025700 | 3.12975300 |

(2') E(UB+HF-LYP) = -1645.715538

|   |             |             |             |
|---|-------------|-------------|-------------|
| H | 2.75176500  | 1.08928200  | -4.49775700 |
| H | -2.37667200 | 2.46447400  | -1.43144800 |
| C | 2.50273100  | 0.26635300  | -3.83588500 |
| H | 1.18920100  | 1.44605600  | -2.58036900 |
| H | -1.52923800 | 1.08336300  | -2.16474900 |
| H | 3.75886900  | -1.20678400 | -4.82116000 |
| C | -1.97447900 | 1.46316700  | -1.23524200 |
| C | 1.62106900  | 0.46704100  | -2.76379000 |
| C | 3.06101800  | -1.01425300 | -4.01100700 |
| H | -0.06737700 | 2.09841000  | -0.64867100 |
| H | -1.91628800 | 2.88560500  | 1.04399200  |
| C | -4.42421800 | 0.90349900  | -0.62589500 |
| N | -0.83540100 | 1.55125600  | -0.25273600 |
| C | -3.08455300 | 0.51854600  | -0.82158800 |
| C | -1.15704000 | 2.09234400  | 1.09557200  |
| H | -0.22910400 | 2.52681500  | 1.48970900  |
| N | 1.27690300  | -0.52246500 | -1.90641700 |
| C | -5.46922400 | -0.00433200 | -0.36975800 |
| H | 6.15866800  | 1.30854100  | 0.19496700  |
| C | 2.71531600  | -2.03680400 | -3.11179500 |
| C | -2.76617400 | -0.89109300 | -0.72929200 |
| H | 3.14361800  | -3.03038800 | -3.20709200 |
| C | 4.03548300  | 1.03546200  | 0.50729900  |
| C | 5.36060300  | 0.59680300  | 0.37403200  |
| C | 1.81515800  | -1.75815300 | -2.06631600 |
| O | -1.50989600 | -1.32726900 | -0.86093200 |
| C | -5.12894700 | -1.37040800 | -0.31781900 |
| H | -2.92802500 | 2.29713600  | 3.20866800  |
| C | -3.82151600 | -1.82144200 | -0.48941300 |
| C | -1.61226200 | 1.01413800  | 2.06650500  |
| O | 1.68557400  | 0.57980700  | 0.85455200  |
| C | 2.93846100  | 0.14985700  | 0.74247400  |
| C | 5.63191500  | -0.78020800 | 0.47200200  |

|    |             |             |             |
|----|-------------|-------------|-------------|
| C  | -2.50203400 | 1.30222000  | 3.11919100  |
| H  | 0.41967100  | -3.26523000 | -1.50596900 |
| C  | 1.35034800  | -2.84222900 | -1.10602400 |
| N  | -1.07781700 | -0.22479100 | 1.91291500  |
| C  | 3.26750000  | -1.24998500 | 0.85027900  |
| C  | 4.59352100  | -1.69452400 | 0.71334200  |
| H  | 2.10331300  | -3.64400600 | -1.06530900 |
| N  | 1.03538300  | -2.31547700 | 0.24815300  |
| C  | -2.84007100 | 0.28872100  | 4.03071500  |
| H  | 4.81218300  | -2.75518400 | 0.80903200  |
| H  | -3.52975300 | 0.48978800  | 4.84577000  |
| H  | 0.26628900  | -2.85967200 | 0.64442800  |
| C  | -1.41347300 | -1.20485300 | 2.78426300  |
| C  | 2.17885700  | -2.23822200 | 1.22401100  |
| C  | -2.28410400 | -0.99435300 | 3.86302100  |
| H  | 1.72839900  | -1.93167100 | 2.17802100  |
| H  | -0.97927000 | -2.18502500 | 2.60864500  |
| H  | 2.62313600  | -3.23735900 | 1.36076800  |
| H  | -2.52581800 | -1.80964400 | 4.53710700  |
| Zn | 0.08924100  | -0.37491800 | -0.00030900 |
| H  | -6.48771700 | 0.33109700  | -0.22725400 |
| H  | -3.56413500 | -2.87385800 | -0.44771200 |
| I  | -6.69656100 | -2.81089000 | 0.05554200  |
| I  | -5.04109100 | 2.99927800  | -0.69992000 |
| I  | 3.60564500  | 3.13818300  | 0.34623300  |
| I  | 7.65538100  | -1.48879600 | 0.25229600  |

Zn 1 mode rb3lyp/6-31g(d)

E = -2963.148768 a.u.

|    |             |             |             |
|----|-------------|-------------|-------------|
| H  | 2.15219800  | 5.60140200  | -1.07026000 |
| C  | 2.37489100  | 4.58141100  | -0.76286600 |
| H  | 3.37374200  | -0.08919100 | -0.53050100 |
| C  | 3.51435600  | 4.31857400  | 0.00540100  |
| C  | 1.51873000  | 3.55309400  | -1.13919200 |
| C  | 3.77699700  | 3.00152700  | 0.37887100  |
| H  | 4.66689700  | 2.77601200  | 0.96619500  |
| C  | 1.75925000  | 2.21010800  | -0.76203700 |
| C  | 2.93485100  | 1.94907600  | 0.00443600  |
| O  | 0.92995500  | 1.25421600  | -1.14267400 |
| H  | 4.24972700  | 0.49541800  | 0.89319600  |
| C  | 3.28014300  | 0.53147300  | 0.37125000  |
| H  | 3.53088900  | -1.61574100 | 1.95819800  |
| N  | -1.52408800 | -0.19741300 | -1.06908000 |
| N  | 2.22096100  | -0.09514300 | 1.19981400  |
| Zn | 0.35016300  | -0.16560900 | 0.05392000  |
| C  | 2.49477000  | -1.46917900 | 1.61352800  |
| H  | 1.82873900  | -1.69844400 | 2.45451200  |
| C  | 2.19289600  | -2.44774800 | 0.49026000  |
| N  | 1.20158900  | -2.10052000 | -0.34931500 |
| H  | 3.67584700  | -3.90769500 | 1.04076600  |
| C  | 2.87214800  | -3.65955200 | 0.35392400  |
| C  | 0.85435100  | -2.93782000 | -1.33688200 |
| H  | 0.05063000  | -2.59945000 | -1.98417600 |
| C  | 2.50600600  | -4.53205700 | -0.66853600 |



|   |             |             |             |
|---|-------------|-------------|-------------|
| C | 1.47518700  | -4.16682600 | -1.53456300 |
| H | 3.02216000  | -5.47993400 | -0.79194600 |
| H | 1.16150900  | -4.81253800 | -2.34794200 |
| H | 2.01967700  | 0.48645500  | 2.01042900  |
| H | 4.18267700  | 5.12103800  | 0.30435500  |
| H | 0.63380700  | 3.75366200  | -1.73775300 |
| O | -0.74599200 | -0.03746400 | 1.60957300  |
| C | -2.08704300 | -0.23030400 | 1.35640900  |
| H | -2.70042900 | 0.33395400  | 2.08540800  |
| C | -2.49304800 | -1.71122300 | 1.47574000  |
| H | -3.57227600 | -1.87029600 | 1.36279000  |
| H | -1.97674200 | -2.32162300 | 0.72458100  |
| H | -2.18918900 | -2.07351500 | 2.46325400  |
| C | -2.44932200 | 0.36698800  | -0.06395800 |
| H | -2.24119200 | 1.43841100  | -0.00447300 |
| H | -1.31859900 | 0.49499600  | -1.78800000 |
| H | -2.02316600 | -0.96749900 | -1.52139300 |
| C | -3.89341800 | 0.08942300  | -0.49703800 |
| O | -4.11468500 | -0.83162000 | -1.29059600 |
| N | -4.90840100 | 0.83085900  | 0.04494000  |
| C | -4.75460300 | 1.96918500  | 0.93765200  |
| H | -5.28627200 | 1.78817800  | 1.88103100  |
| H | -3.70956000 | 2.15922500  | 1.17144400  |
| H | -5.17931400 | 2.87215200  | 0.47759300  |
| C | -6.28383300 | 0.51948300  | -0.32081200 |
| H | -6.74655500 | 1.37187500  | -0.83619900 |
| H | -6.27967400 | -0.34641000 | -0.98060700 |
| H | -6.87491900 | 0.29849500  | 0.57745200  |

Zn 2 mode rb3lyp/6-31g(d)

E = -2963.093592 a.u.

|   |             |             |             |
|---|-------------|-------------|-------------|
| H | -5.29602400 | -3.37652400 | -1.43657300 |
| C | -4.82023100 | -2.49318800 | -1.01557700 |
| H | -2.73728900 | 1.73363600  | -0.25488100 |
| C | -5.46510000 | -1.77265800 | -0.00309100 |
| C | -3.57580600 | -2.09750500 | -1.49246200 |
| C | -4.83857000 | -0.64107300 | 0.51510300  |
| H | -5.33198400 | -0.05816000 | 1.29250100  |
| C | -2.91864400 | -0.95925700 | -0.97135500 |
| C | -3.58976400 | -0.22052600 | 0.04401900  |
| O | -1.73712000 | -0.59287400 | -1.44025200 |
| H | -3.62379300 | 1.54555500  | 1.26850500  |
| C | -2.95152500 | 1.03390100  | 0.56387000  |
| H | -1.83049400 | 2.58197900  | 2.33346800  |
| N | 1.36187400  | -0.50533500 | -1.31790000 |
| N | -1.64199400 | 0.75909500  | 1.23166300  |
| C | -1.06199600 | 1.94714500  | 1.86850700  |
| H | -0.39298100 | 1.60801800  | 2.66994000  |
| C | -0.23699300 | 2.76450800  | 0.88793500  |
| N | 0.37859200  | 2.06872100  | -0.08192000 |
| H | -0.58195000 | 4.67709900  | 1.81734600  |
| C | -0.05537300 | 4.13899400  | 1.03461600  |
| C | 1.24824500  | 2.69359800  | -0.89737000 |
| H | 1.79798200  | 2.06864500  | -1.59943700 |
| C | 0.81697800  | 4.79759600  | 0.16874500  |

|    |             |             |             |
|----|-------------|-------------|-------------|
| C  | 1.49430500  | 4.06116600  | -0.80210900 |
| H  | 0.97414900  | 5.86866700  | 0.26054800  |
| H  | 2.20440600  | 4.52778600  | -1.47629400 |
| H  | -1.78445700 | 0.02752700  | 1.92619400  |
| H  | -6.43639800 | -2.08485400 | 0.36950200  |
| H  | -3.07326300 | -2.65339100 | -2.27910000 |
| O  | 3.56547100  | 0.25131000  | -2.19126100 |
| C  | 3.78714700  | -0.66437100 | -1.23035400 |
| H  | 4.64415200  | -0.40417600 | -0.55957600 |
| C  | 4.04439300  | -2.08665200 | -1.78599500 |
| H  | 4.25807200  | -2.84491300 | -1.01881500 |
| H  | 3.18783500  | -2.43053800 | -2.38012800 |
| H  | 4.89963400  | -2.03201700 | -2.46709900 |
| C  | 2.45366400  | -0.59160800 | -0.31279700 |
| H  | 1.19388100  | -1.44319900 | -1.69128400 |
| H  | 1.94888300  | -0.01251500 | -2.07331400 |
| C  | 1.89949100  | -1.44158800 | 0.83642400  |
| O  | 0.65036600  | -1.39340300 | 1.02378600  |
| N  | 2.66901100  | -2.16218800 | 1.67588600  |
| H  | 2.53624500  | 0.41299200  | 0.12828200  |
| C  | 4.12683700  | -2.15454700 | 1.70084700  |
| H  | 4.51993300  | -3.15432000 | 1.48254600  |
| H  | 4.52599600  | -1.44963200 | 0.97606600  |
| H  | 4.46592300  | -1.86172400 | 2.70261800  |
| C  | 2.04210100  | -2.92788200 | 2.75099000  |
| H  | 0.97558800  | -3.01753100 | 2.55599000  |
| H  | 2.49850600  | -3.92264600 | 2.79476300  |
| H  | 2.19502800  | -2.43255300 | 3.71894500  |
| Zn | -0.31115500 | 0.01893900  | -0.33042200 |
